# Supplementary material
Source: PubMed Central journal article supplement (PMC1634794)
Supplement: rspb20063519s11.pdf [file rspb20063519s11.pdf]

1 **Electronic Supplementary Material, part A**

2 **Alternative Model in Which Recovereds Are Included and**

3 **Birth Rate of Infecteds Is Decreased**

4 In this section we generalize the model type by extending the categories to  
5 include, besides susceptible and infected individuals, also recovered and  
6 recovered/immune individuals. In addition, here we allow the birth rate of infected  
7 individuals to be an arbitrary value,  $a_{inf}$ , which can be less than the birth rate of resistant  
8 individuals,  $a_{RR}$ , so this corresponds to Case 4 in the text. This is done by using the  
9 following substitution to equation (2b):

10 
$$gamX_r = \frac{a_{rr}X_{rr} + a_{inf}Y_{rr} + 0.5a_{Rr}X_{Rr}}{1 + \rho N}. \quad (A1)$$

11 These generalizations do not affect our ability to analyze the system. The equations are  
12 generalized by allowing infecteds to recover and become immune at rate  $IY_{rr}$  or  
13 susceptible again at rate  $RY_{rr}$ . (Recovered/immunes are not expected in plants, so it is  
14 reasonable to set  $I = 0$  in that case.) The differential equations for the system become:

15 
$$dX_{RR} / dt = newX_{RR} - bX_{RR} \quad (A2)$$

16 
$$dX_{Rr} / dt = newX_{Rr} - bX_{Rr} \quad (A3)$$

17 
$$dX_{rr} / dt = newX_{rr} - (b + \beta Y_{rr})X_{rr} + RY_{rr} \quad (A4)$$

18 
$$dY_{rr} / dt = \beta Y_{rr} X_{rr} - (b + \alpha + R + I)Y_{rr} \quad (A5)$$

19 
$$dZ_{rr} / dt = IY_{rr} - bZ_{rr} \quad (A6)$$

20 where  $Z_{rr}$  is the number of recovered immune individuals in the population. The steady  
21 state solutions to this model are

$$1 \quad X_{rr}^* = \frac{(b + \alpha + R + I)}{\beta} \quad (\text{A7})$$

$$2 \quad Y_{rr}^* = \frac{X_{rr}^* b \left( \frac{a_{rr}}{a_{RR}} - 1 \right)}{\left( \beta X_{rr}^* - R - \frac{a_{inf}}{a_{RR}} b - \frac{a_{rr}}{a_{RR}} b I \right)} \quad (\text{A8})$$

$$3 \quad Z_{rr}^* = I Y_{rr}^* / b \quad (\text{A9})$$

$$4 \quad X_{RR}^* + X_{Rr}^* = (a_{RR} - b) / (\rho b) - X_{rr}^* - Y_{rr}^* - Z_{rr}^* \quad (\text{A10})$$

5

6 Note that this solution, as in Case 2, is independent of the inbreeding coefficient  $F$ . We  
 7 can examine the effects of  $a_{inf}$  alone (Case 4), by setting  $R = I = 0$ . Then it is easy to see  
 8 that reduction of the birth rate of infecteds from  $a_{rr}$  to a lower value, say  $a_{inf} < a_{RR}$ , causes  
 9  $Y_{rr}^*$  to decrease.

10

## 11 **Electronic Supplementary Material, part B**

### 12 **General Expression for Infection Rate**

13

14 For simplicity in the text we used a basic Lotka-Volterra function for the rate of  
 15 infections,  $\beta Y_{rr} X_{rr}$ . However, this can be generalized to any function of the form  $f(X_{rr}) Y_{rr}$   
 16 without affecting our ability to analyze the model. For example, suppose  $f(X_{rr})$  takes the  
 form of a Holling Type II functional response,

$$17 \quad f(X_{rr}) = \frac{\beta_1 X_{rr}}{1 + \beta_2 X_{rr}} \quad (\text{B1})$$

18

Then Equation (6a) in the text becomes

$$19 \quad X_{rr}^* = \frac{b + \alpha}{\beta_1 - \beta_2 (b + \alpha)} \quad (\text{B2})$$

1 and (6b) takes the form

$$2 \quad Y_{rr}^* = \frac{X_{rr}^* \times b[(a_{rr} / a_{RR}) - 1]}{f(X_{rr}^*) - b(a_{rr} / a_{RR})} \quad (\text{B3})$$

3 Other steady state values are modified through the above changes in  $X_{rr}^*$  and  $Y_{rr}^*$ . Note  
4 that for the Holling Type II response, the value of  $X_{rr}^*$  is likely to be higher than in the  
5 case of the Lotka-Volterra interaction. This would tend to have a negative effect on the  
6 value of  $X_{RR}^*$  and  $X_{Rr}^*$ , due to limited carrying capacity.

7 The above solutions are independent of  $F$ . But we can also consider the case  
8 where the infection rate itself depends on  $F$ . The reason for such an assumption is that  
9 greater inbreeding would increase the probability of susceptibles coming in contact with  
10 infecteds, both being homozygous in  $r$ . That effect could easily be incorporated into our  
11 model by generalizing the interaction function to  $f(X_r, F)$ . For interaction rates of this  
12 form, analytic solutions of the same form as Equations (B2) and (B3) are possible. One  
13 situation might be for  $\beta_I$  to be an increasing function of  $F$ ,  $\beta_I(F)$ . In this case,  $X_{rr}^*$  would  
14 decrease with increasing  $F$ , but  $Y_{rr}^*$  could increase as the denominator of Equation (B3)  
15 decreases. The results of Cases 2 and 3 could change substantially. We have not tried to  
16 explore this possibility numerically, but will in future work. More complex interaction  
17 functions that involve not only  $F$  and  $X_{rr}$ , but also  $X_{Rr}$ , and  $X_{RR}$ , can also be imagined, and  
18 these might be beyond the possibility of analytic solution.

1 **Electronic Supplementary Material, part C**

2 **Calculation of  $X_{Rr}^*$  and  $X_{RR}^*$**

3 It is possible, using the right hand side of equation (1b) set to zero, to solve for  
4  $X_{Rr}^*$ , given  $X_{Rr}^* + X_{RR}^*$  from equation (6b). Let's put the previously calculated sum of  
5 the resistant homozygote and heterozygote in parentheses to be treated as a known unit,  
6 as follows:

7  $\{X_{Rr}^* + X_{RR}^*\} \equiv X_{Rr}^* + X_{RR}^*$ .

8 Then we can show, using (1b), that

9 
$$X_{Rr}^* = -0.5(B/A) - 0.5\sqrt{(B/A)^2 - 4(C/A)} \quad (C1)$$

10 where

11 
$$A = b(1 + \rho N^*)(a_{RR} - a_{Rr}) - (1 - F)(a_{RR} - 0.5a_{Rr})a_{Rr}$$

12 
$$B = (1 - F)a_{RR}\{X_{RR}^* + X_{Rr}^*\}a_{Rr} - 2(1 - F)(a_{RR} - 0.5a_{Rr})(a_{rr}X_{rr}^* + a_{rr}Y_{rr}^*)$$
  
$$- b(1 + \rho N^*)[a_{RR}\{X_{RR}^* + X_{Rr}^*\} + a_{rr}X_{rr}^* + a_{rr}Y_{rr}^*]$$

13 
$$C = 2(1 - F)a_{RR}\{X_{RR}^* + X_{Rr}^*\}(a_{rr}X_{rr}^* + a_{rr}Y_{rr}^*)$$

14

15 From  $X_{Rr}^*$ , it is next possible to solve for  $X_{RR}^*$ , using the known value of  $\{X_{Rr}^* + X_{RR}^*\}$   
16 from equation (6b); that is,

17 
$$X_{RR}^* = \{X_{Rr}^* + X_{RR}^*\} - X_{Rr}^* \quad (C2)$$

18 In some cases, the cost of resistance may be so high that the *R*-allele goes to  
19 extinction (Figure E1). However, if  $a_{RR} < a_{Rr}$ , then when *F* is small (high outcrossing),  
20 the presence of the heterozygote may be able to maintain the *R*-allele in the population, as  
21 occurs in Figure E1. An additional feature of the behaviour of the variables for Case 3

1 ( $a_{RR} < a_{Rr} < a_{rr}$ ), not mentioned in the main text, is the possibility of unimodal behaviour  
 2 of  $X_{RR}^*$  as a function of  $F$  (electronic Figure E2). This intermediate peak can occur when  
 3 there is a high cost of disease resistance (i.e., the value of  $a_{RR}$  is significantly smaller than  
 4  $a_{rr}$ ), and the heterozygote reproduction rate is intermediate between the two  
 5 homozygotes. Because the  $RR$ - homozygote is a poor competitor against the  $rr$ -  
 6 homozygote,  $X_{RR}$  has a small value for high rates of selfing. For intermediate selfing  
 7 rates, the presence of the heterozygote, which has higher fitness than the  $RR$ -homozygote,  
 8 can help  $X_{RR}$  maintain higher values.

9  
 10

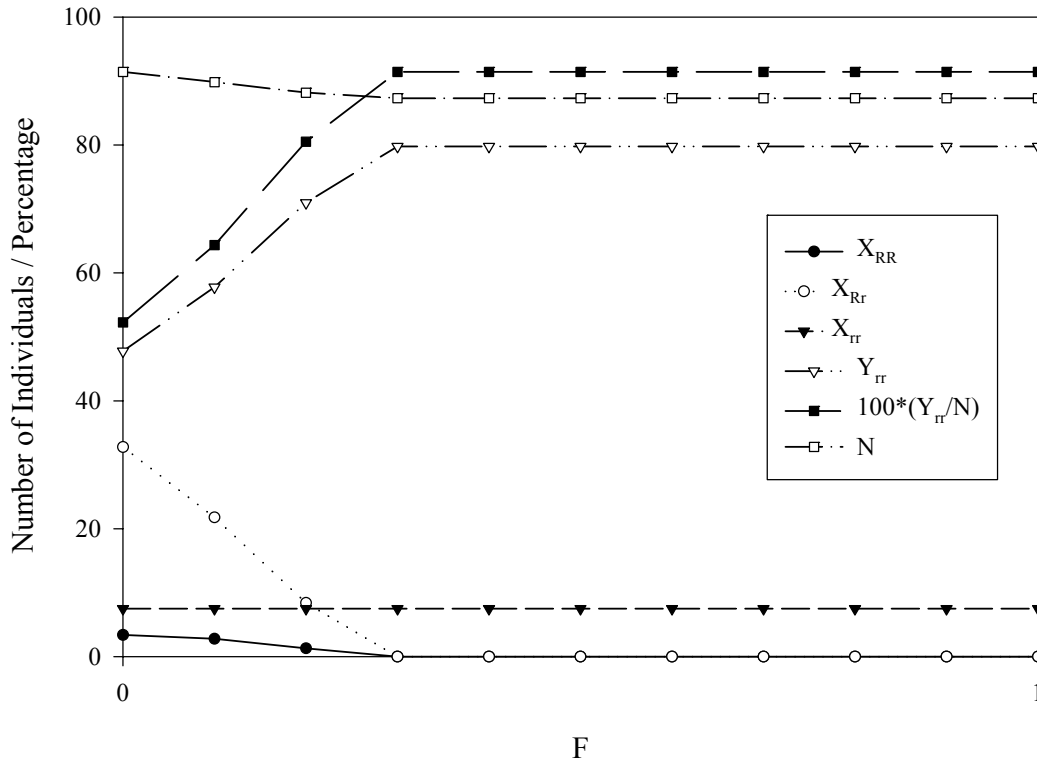

11  
 12

13 **Figure E1:** The number of homozygous resistant, heterozygous resistant, susceptible, and  
 14 infected individuals, percentage infected in the population, and total number of  
 15 individuals at equilibrium for the range of complete selfing through complete  
 16 outcrossing. Parameters:  $a_{RR} = 0.4$ ,  $a_{Rr} = 0.6$ ,  $a_{rr} = 0.8$ ,  $b = 0.2$ ,  $\alpha = 0.1$ ,  $\beta = 0.04$ ,  
 17  $\rho = 0.02$ . (Case 3,  $a_{RR} < a_{Rr} < a_{rr}$ )

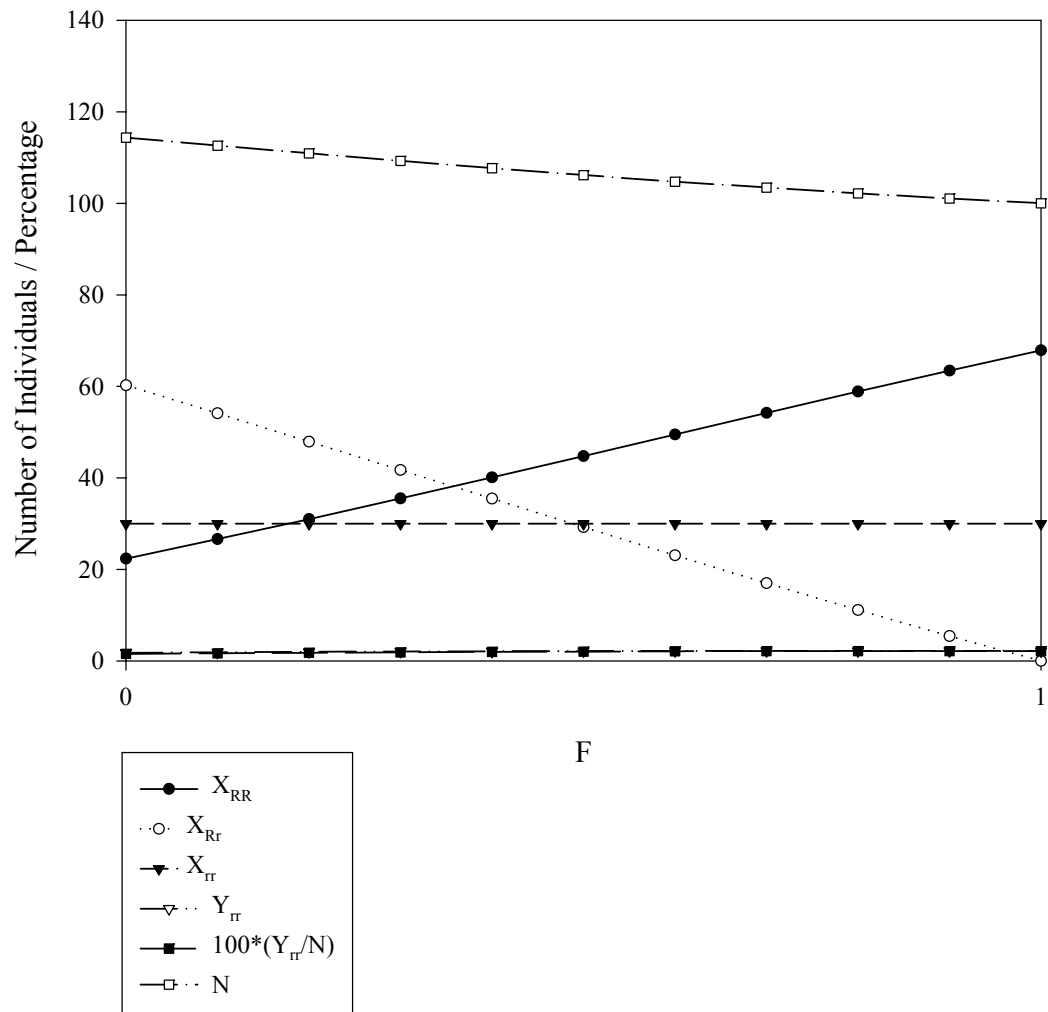

1  
2

3 **Figure E2:** The number of homozygous resistant, heterozygous resistant, susceptible, and  
 4 infected individuals, percentage infected in the population, and total number of  
 5 individuals at equilibrium for the range of complete selfing through complete  
 6 outcrossing. Parameters:  $a_{RR} = 0.6$ ,  $a_{Rr} = 0.7$ ,  $a_{rr} = 0.8$ ,  $b = 0.2$ ,  $\alpha = 1.0$ ,  $\beta = 0.04$ ,  
 7  $\rho = 0.02$ . (Case 3,  $a_{RR} < a_{Rr} < a_{rr}$ )  
 8

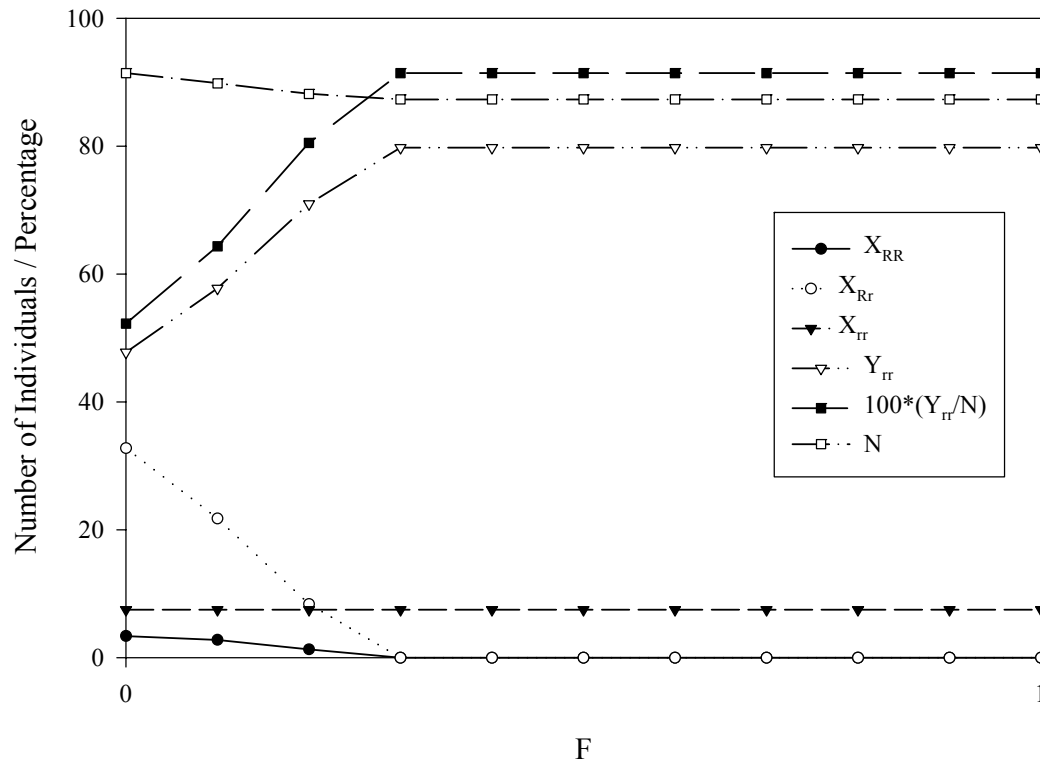

1  
2  
3  
4  
5  
6  
7  
8

**Figure E3:** The number of homozygous resistant, heterozygous resistant, susceptible, and infected individuals, percentage infected in the population, and total number of individuals at equilibrium for the range of complete selfing through complete outcrossing. Parameters:  $a_{RR} = 0.4$ ,  $a_{Rr} = 0.6$ ,  $a_{rr} = 0.8$ ,  $b = 0.2$ ,  $\alpha = 1.0$ ,  $\beta = 0.04$ ,  $\rho = 0.02$ . (Case 3,  $a_{RR} < a_{Rr} < a_{rr}$ )
